# Supplementary material for: A targetable OSGIN1 − AMPK − SLC2A3 axis controls the vulnerability of ovarian cancer to ferroptosis
Source: PubMed Central journal article supplement — NPJ Precis Oncol. 2025 Jan 14;9:15. doi: 10.1038/s41698-024-00791-8 (PMC11733211; doi:10.1038/s41698-024-00791-8), 2025-01-14
Supplement: 41698_2024_791_MOESM1_ESM.pdf [file 41698_2024_791_MOESM1_ESM.pdf]

**Supplementary Table 1: Description of Ovarian Cancer Tissue Samples**

| Patient number | Age | Pathological diagnosis                                  | FIGO stage | p53             | Experimental Study               |
|----------------|-----|---------------------------------------------------------|------------|-----------------|----------------------------------|
| 1              | 42  | High grade serous carcinoma of ovary and fallopian tube | Ila        | Missense mutant | qRT-PCR, IHC                     |
| 2              | 70  | High grade serous carcinoma of ovary and fallopian tube | IIIc       | Missense mutant | qRT-PCR, IHC                     |
| 3              | 73  | High grade serous carcinoma of ovary and fallopian tube | IIIc       | Missense mutant | qRT-PCR, IHC                     |
| 4              | 56  | High grade serous carcinoma of ovary and fallopian tube | IVB        | Nonsense mutant | qRT-PCR, IHC                     |
| 5              | 67  | High grade serous carcinoma of ovary and fallopian tube | IIIB       | Missense mutant | qRT-PCR, IHC                     |
| 6              | 50  | High grade serous carcinoma of ovary                    | IA         | Missense mutant | qRT-PCR, IHC                     |
| 7              | 54  | High grade serous carcinoma of ovary and fallopian tube | IIIc       | Missense mutant | qRT-PCR, IHC                     |
| 8              | 51  | High grade serous carcinoma of ovary                    | IIB        | Wild type       | MDA, Fe <sup>2+</sup> , GSH/GSSG |
| 9              | 58  | High grade serous carcinoma of ovary and fallopian tube | IIA        | Nonsense mutant | MDA, Fe <sup>2+</sup> , GSH/GSSG |
| 10             | 58  | High grade serous carcinoma of ovary and fallopian tube | IIIC       | Missense mutant | MDA, Fe <sup>2+</sup> , GSH/GSSG |
| 11             | 64  | High grade serous carcinoma of ovary and fallopian tube | IIIC       | Missense mutant | MDA, Fe <sup>2+</sup> , GSH/GSSG |
| 12             | 47  | High grade serous carcinoma of ovary and fallopian tube | IC         | Missense mutant | MDA, Fe <sup>2+</sup> , GSH/GSSG |
| 13             | 58  | High grade serous carcinoma of ovary and fallopian tube | IC         | Nonsense mutant | MDA, Fe <sup>2+</sup> , GSH/GSSG |
| 14             | 49  | High grade serous carcinoma of ovary and fallopian tube | IIIC       | Missense mutant | MDA, Fe <sup>2+</sup> , GSH/GSSG |
| 15             | 63  | High grade serous carcinoma of ovary and fallopian tube | IV         | Missense mutant | PDX                              |

**Supplementary Table 2: Clinical Profile of Patients Donating Normal Ovaries**

| <b>Patient /block number</b> | <b>Age (years)</b> | <b>Reason for surgery</b>                  | <b>Ovary diseases</b> | <b>Experimental Study</b>        |
|------------------------------|--------------------|--------------------------------------------|-----------------------|----------------------------------|
| 1                            | 53                 | Fibroids                                   | No                    | qRT-PCR, IHC                     |
| 2                            | 61                 | Cervical intraepithelial neoplasia III     | No                    | qRT-PCR, IHC                     |
| 3                            | 60                 | Fibroids                                   | No                    | qRT-PCR, IHC                     |
| 4                            | 58                 | Cervical intraepithelial neoplasia III     | No                    | qRT-PCR, IHC                     |
| 5                            | 56                 | Fibroids                                   | No                    | qRT-PCR, IHC                     |
| 6                            | 54                 | Fibroids                                   | No                    | qRT-PCR, IHC                     |
| 7                            | 56                 | Fibroids                                   | No                    | qRT-PCR, IHC                     |
| 8                            | 57                 | Fibroids                                   | No                    | MDA, Fe <sup>2+</sup> , GSH/GSSG |
| 9                            | 61                 | Fibroids                                   | No                    | MDA, Fe <sup>2+</sup> , GSH/GSSG |
| 10                           | 59                 | Cervical intraepithelial neoplasia III     | No                    | MDA, Fe <sup>2+</sup> , GSH/GSSG |
| 11                           | 56                 | Cervical intraepithelial neoplasia III     | No                    | MDA, Fe <sup>2+</sup> , GSH/GSSG |
| 12                           | 67                 | Cervical intraepithelial neoplasia III     | No                    | MDA, Fe <sup>2+</sup> , GSH/GSSG |
| 13                           | 66                 | Cervical intraepithelial neoplasia II      | No                    | MDA, Fe <sup>2+</sup> , GSH/GSSG |
| 14                           | 55                 | Cervical squamous cell carcinoma stage IA2 | No                    | MDA, Fe <sup>2+</sup> , GSH/GSSG |

# Supplementary Figure 1

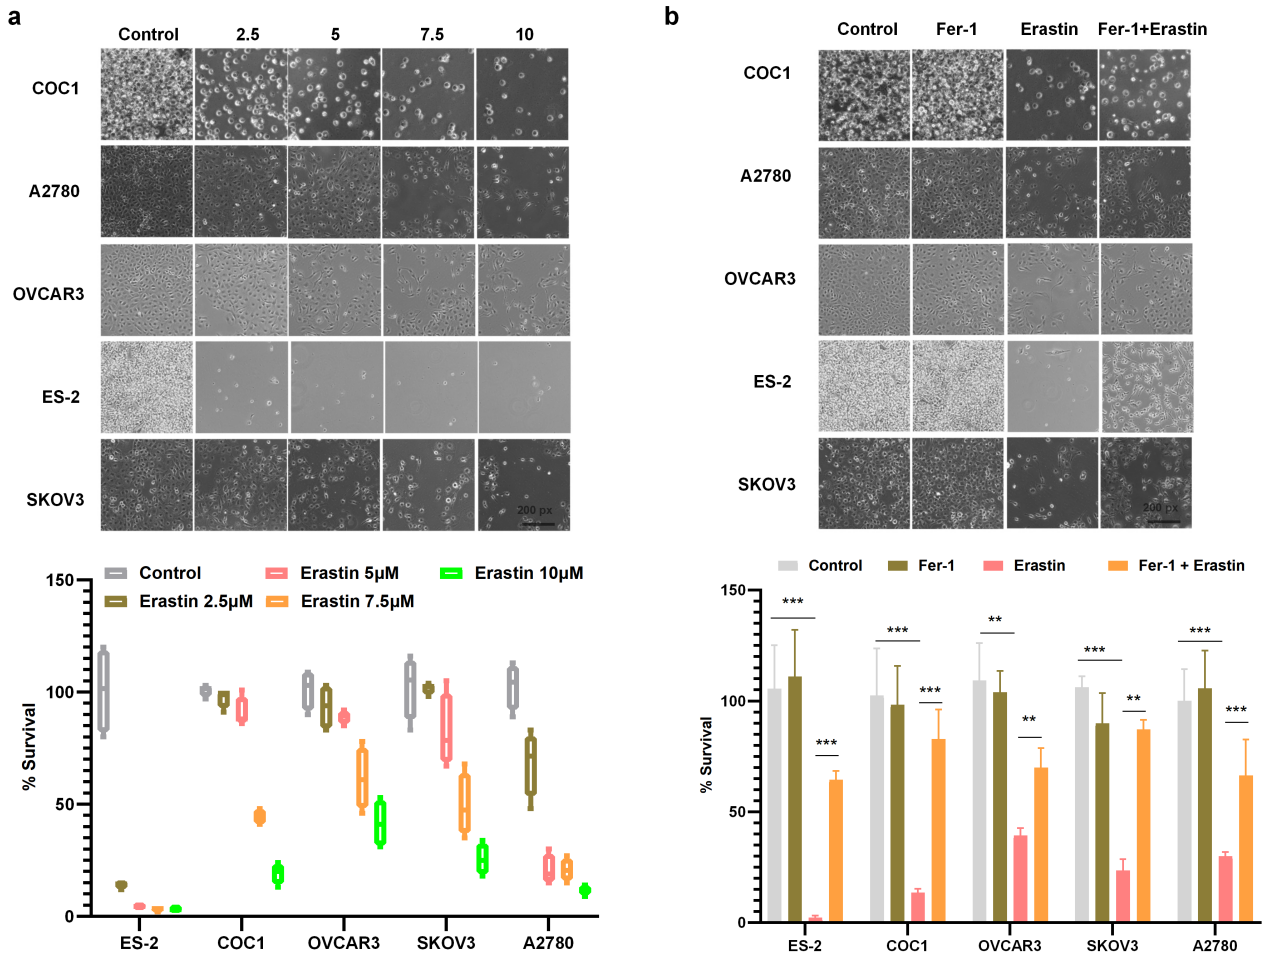

Supplementary Figure 1. Ferroptosis was occurred in erastin-treated ovarian cancer cells. a The effect of different concentrations (0, 2.5, 7.5, 10  $\mu$ M) of erastin on cell viability as determined by CCK8 assay. b The viability of ES-2, COC1, OVCAR3, SKOV3 and A2780 cells treated with DMSO (control), erastin (10  $\mu$ M), alone or in combination with fer-1(10  $\mu$ M) were analyzed with the CCK8 assay. Each experiment was repeated three times. The p values in a-b were determined by two-way ANOVA with multiple comparisons. \* $p < 0.05$ ; \*\* $p < 0.01$  and \*\*\* $p < 0.001$ .

# Supplementary Figure 2

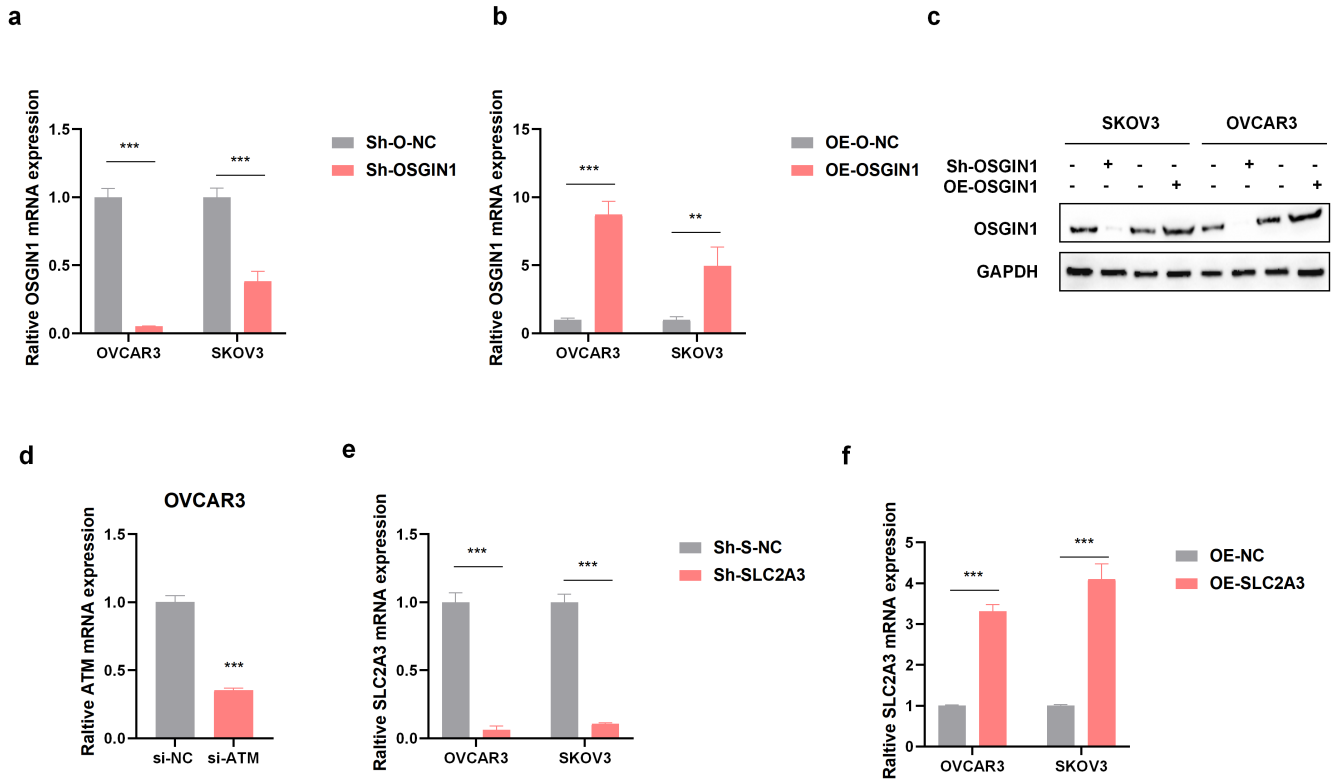

Supplementary Figure 2. Enhancing or reducing the efficiency of knocking down or overexpressing various genes. a-c The knock-down or overexpression efficiency of OSGIN1 was verified through western blot and qRT-PCR analysis. d The knock-down efficiency of ATM was verified through qRT-PCR analysis. e-f The knock-down or overexpression efficiency of SLC2A3 was verified through qRT-PCR analysis. Each experiment was repeated three times. The p values in a-b and e-f were determined by one-way ANOVA with multiple comparisons. Statistical significance in d was determined by a two-tailed unpaired t-test.  $**p < 0.01$  and  $***p < 0.001$

# Supplementary Figure 3

a

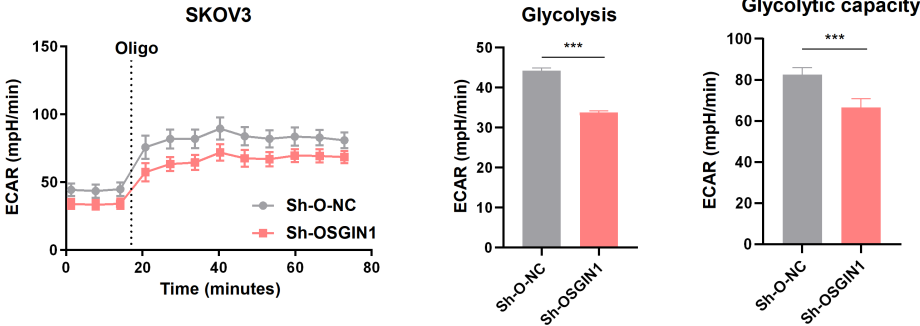

b

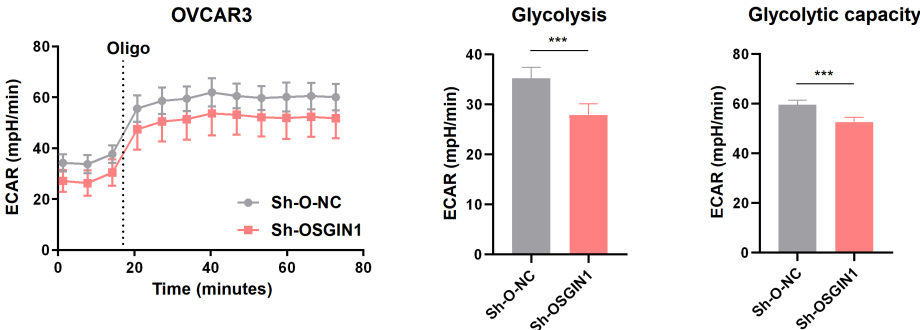

Supplementary Figure 3. ECAR (extracellular acidification rate) results for SKOV3 and OVCAR3 cells transfected with sh-O-NC or sh-OSGIN1 by using Seahorse XF96 analyzer. Glycolysis: ECAR values before the addition of oligomycin; Glycolytic capacity: ECAR values following addition of oligomycin. \*\*\* $p < 0.001$

# Supplementary Figure 4

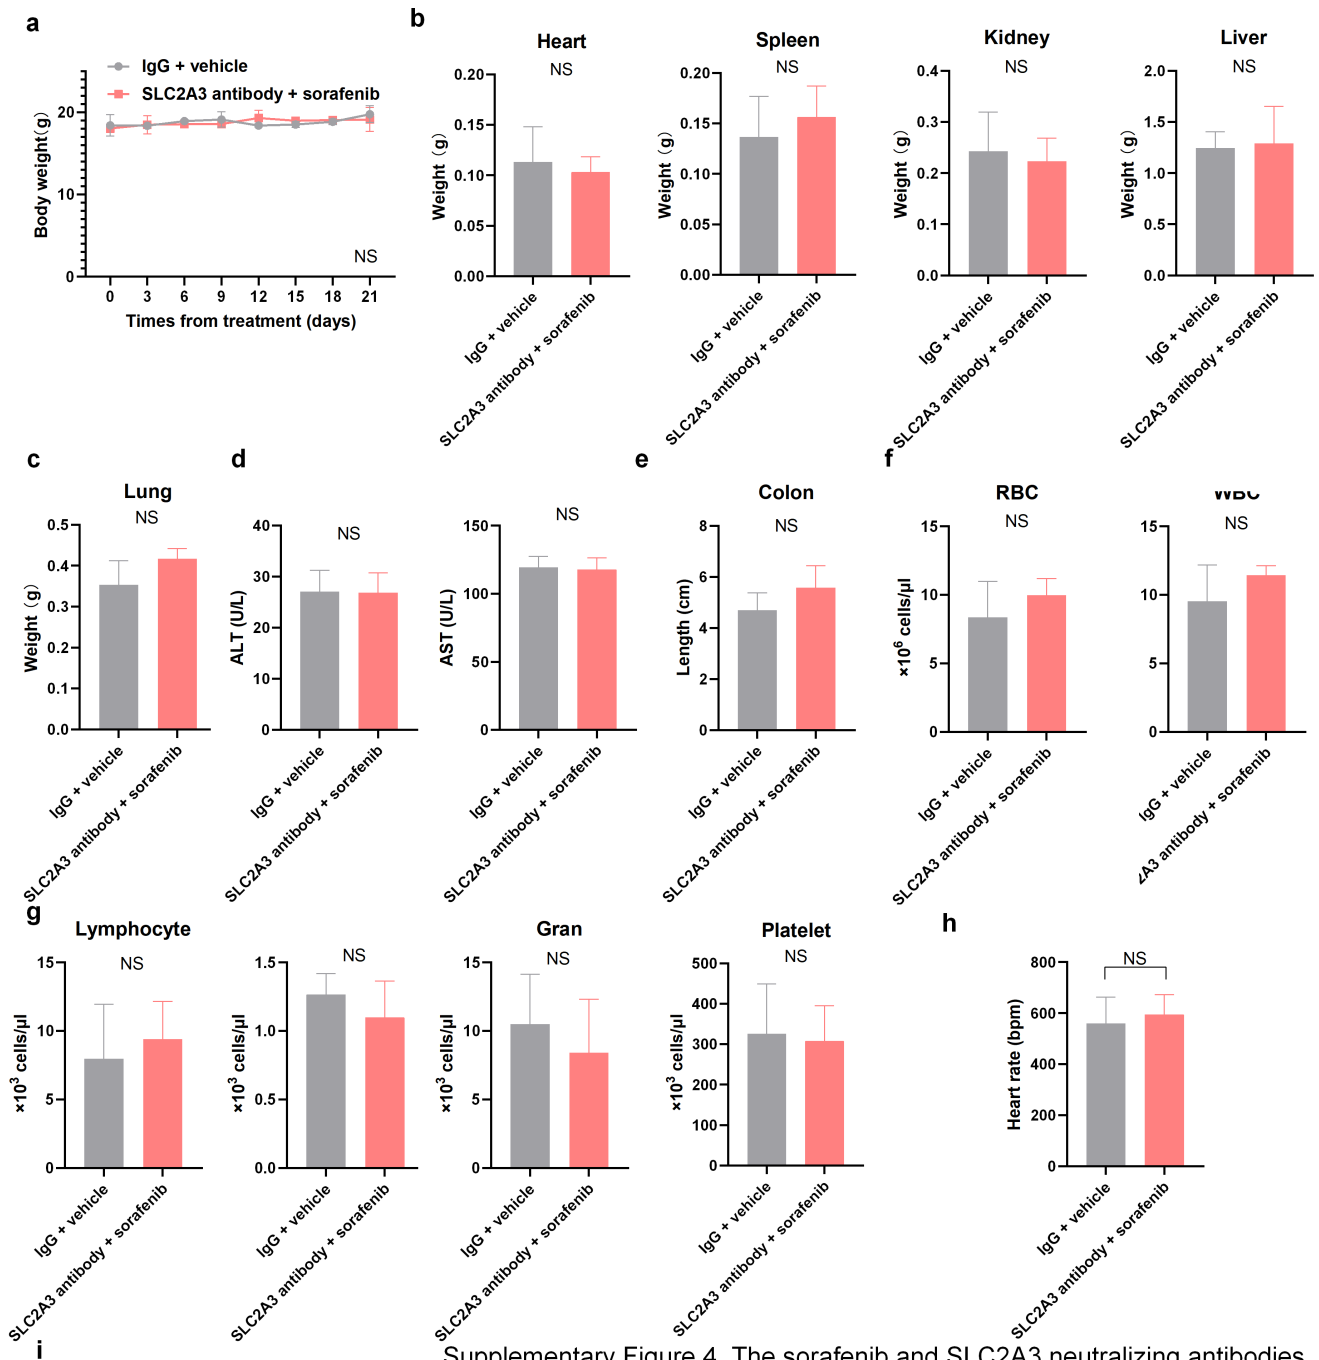

Supplementary Figure 4. The sorafenib and SLC2A3 neutralizing antibodies in combination has a good safety profile in NOD-SCID-IL2R $\gamma^{-/-}$  mice. The sorafenib was administered at a dose of 30 mg/kg body weight via oral gavage once daily until day 21. Additionally, the SLC2A3-neutralizing antibody was administered once daily via intraperitoneal injection at a dose of 100  $\mu$ g per mouse until day 21. And then euthanized for toxicity studies (n = 3). a Body weight change. b-c Heart, liver, spleen, lung, and kidney weights. d Serum concentrations of AST and ALT. e Colon length. f-g Whole blood counts of red blood cells (RBCs), white blood cells (WBCs), platelets, lymphocytes, monocytes and gran using a Mindray whole-cell blood analyzer. h Heart rate was measured 1 day after the final treatment. bpm, beats per minute. i Blood pressure of mice was measured 1 day after the final treatment. D, M, and S represent diastolic, mean, and systolic blood pressure, respectively. The data are presented as the means  $\pm$  SEMs and were analyzed by unpaired Student's t test. NS,  $P > 0.05$ .

# Supplementary Figure 5

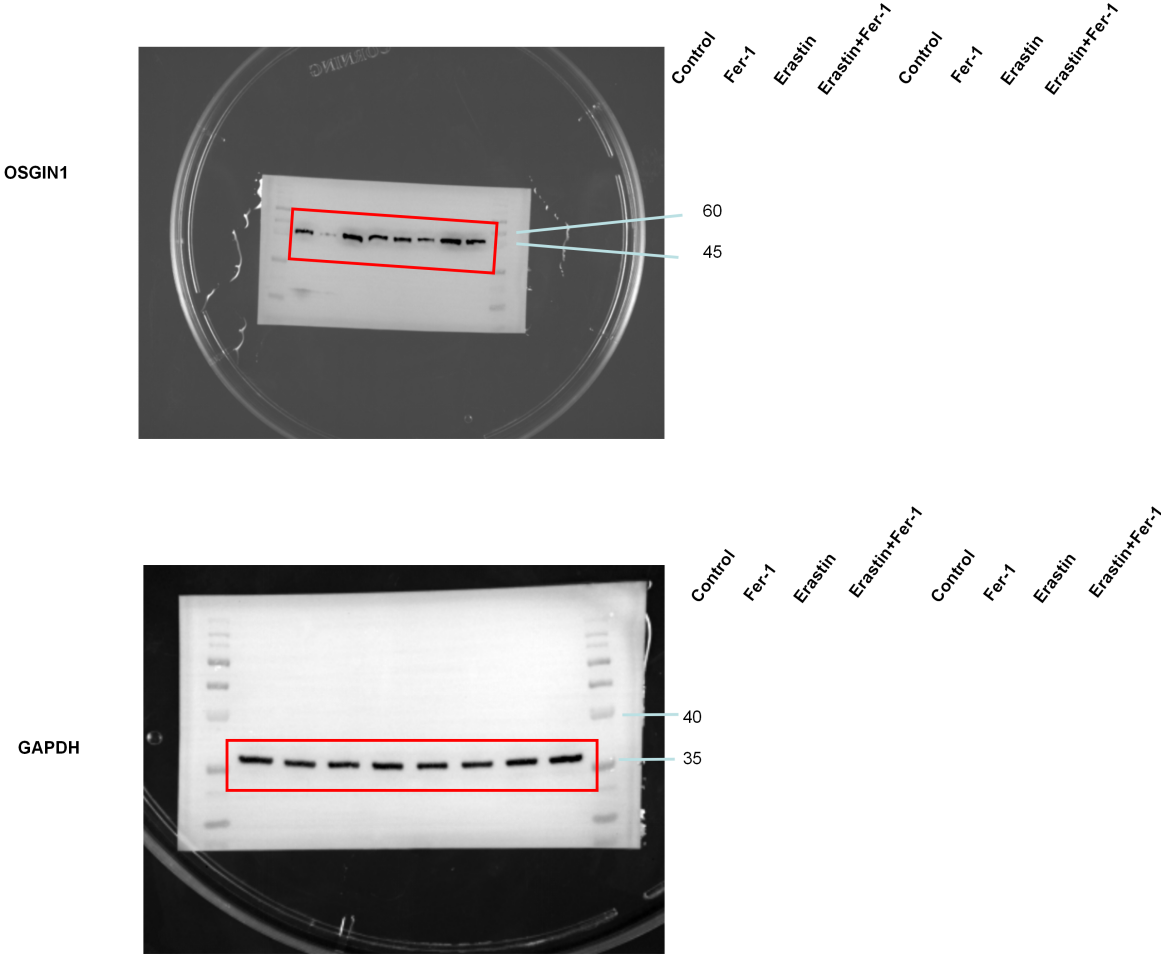

Supplementary Figure 5. Full-size blots of Figure 2d.

# Supplementary Figure 6

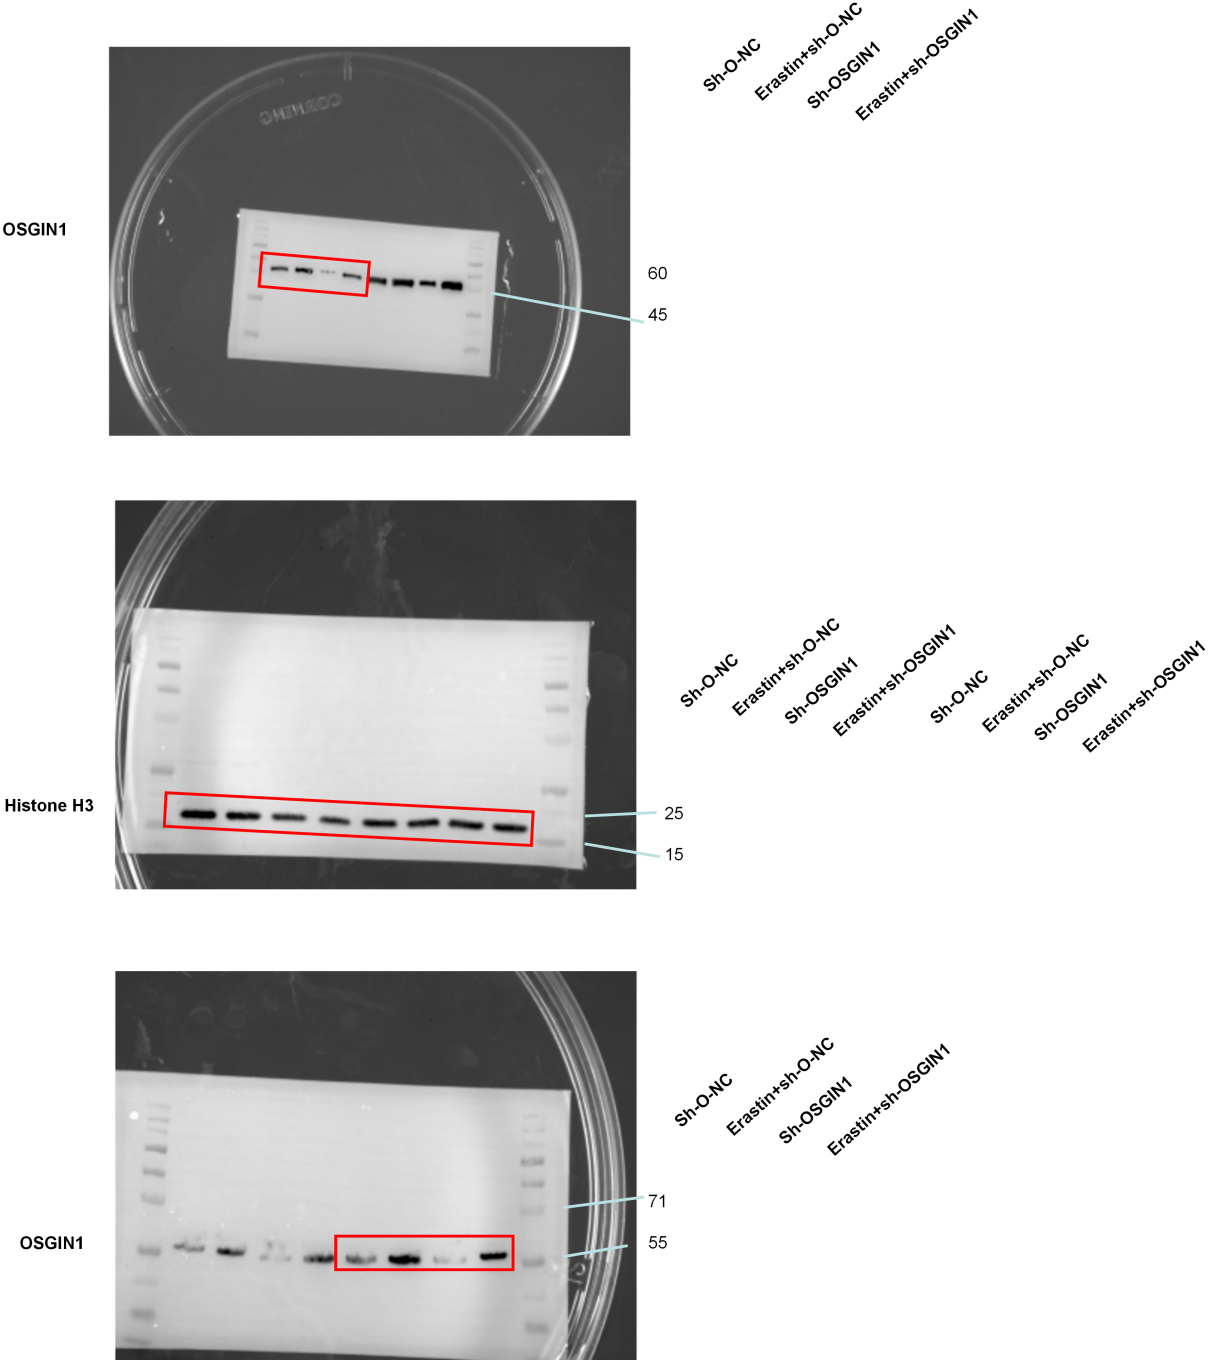

Supplementary Figure 6. Full-size blots of Figure 3a.



# Supplementary Figure 7

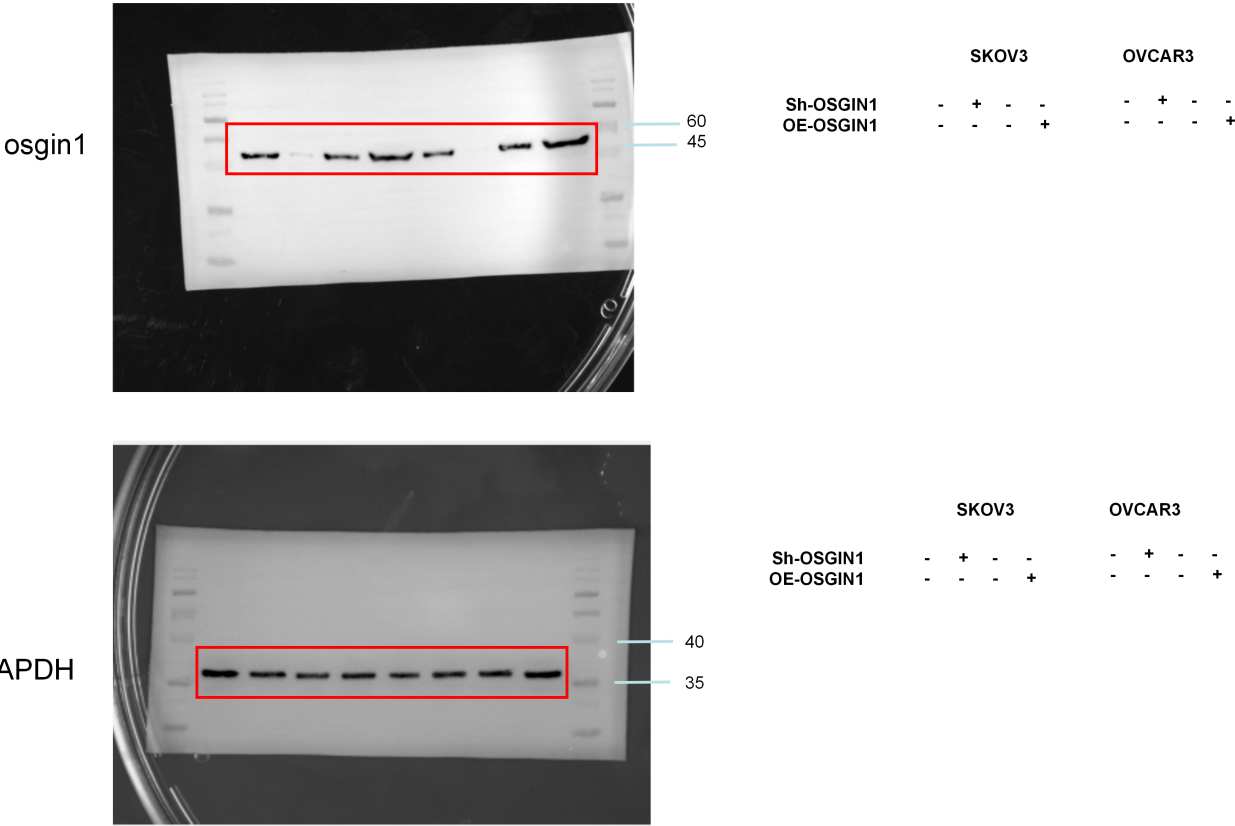

Supplementary Figure 7. Full-size blots of Supplementary Figure 2c.

# Supplementary Figure 8

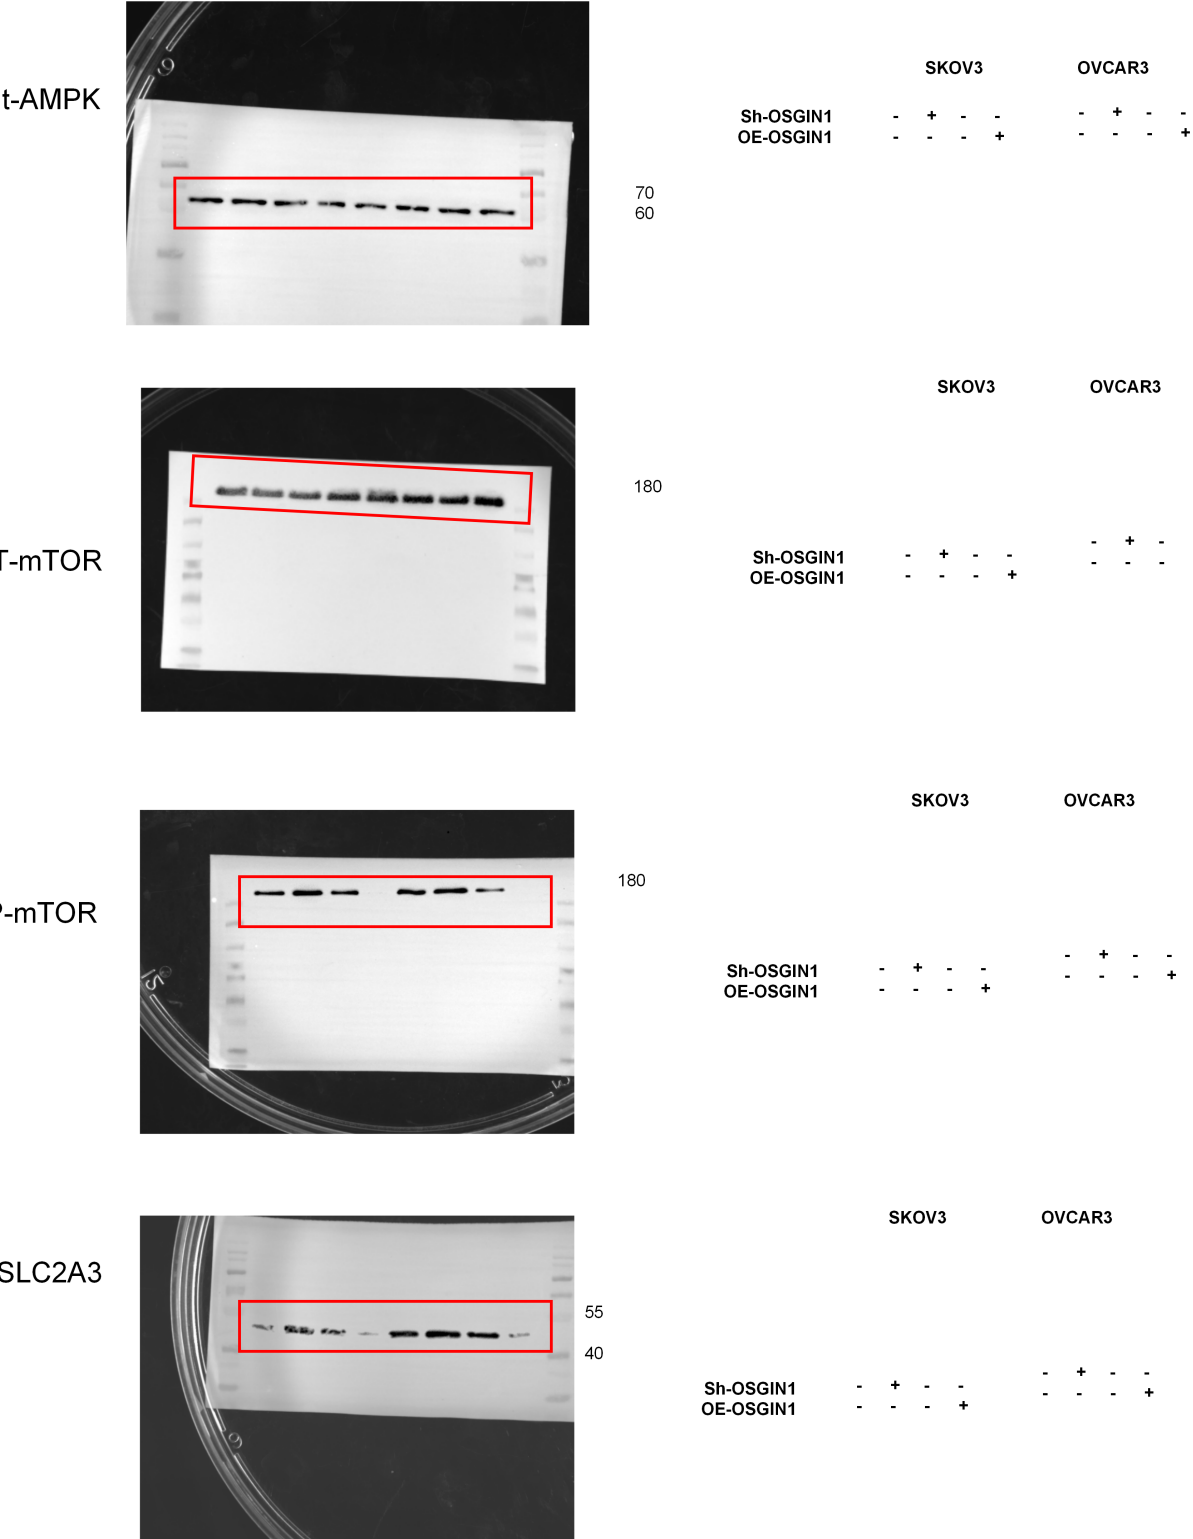

Supplementary Figure 8. Full-size blots of Figure 4d.

# Supplementary Figure 9

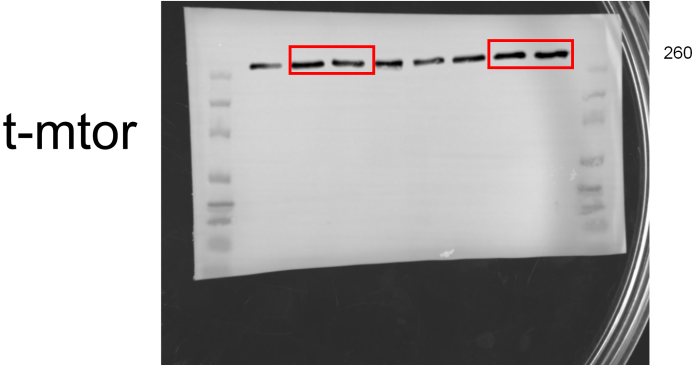

|            |   | OVCAR3 |   |   |   |
|------------|---|--------|---|---|---|
| AICAR      | + | -      | - | - | - |
| Compound C | - | -      | - | - | + |

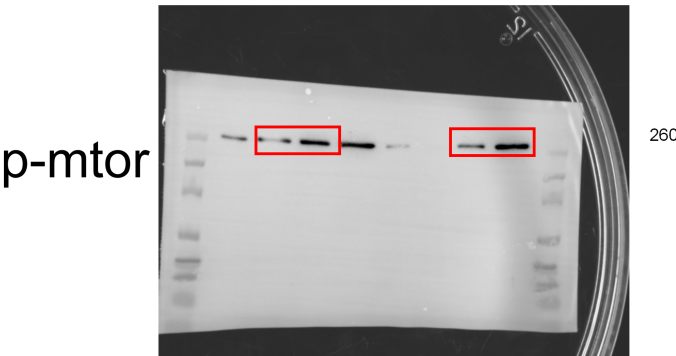

|            |   | OVCAR3 |   |   |   |
|------------|---|--------|---|---|---|
| AICAR      | + | -      | - | - | - |
| Compound C | - | -      | - | - | + |

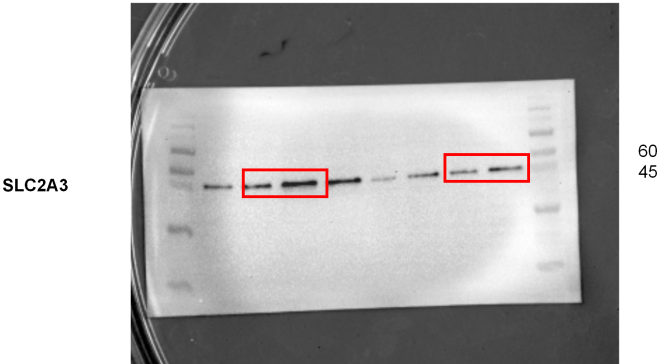

|            |   | OVCAR3 |   |   |   |
|------------|---|--------|---|---|---|
| AICAR      | + | -      | - | - | - |
| Compound C | - | -      | - | - | + |

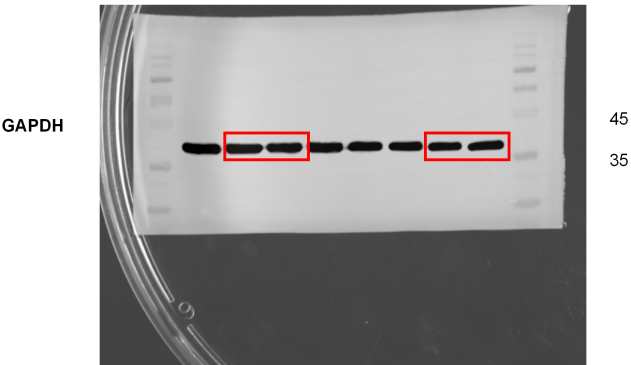

|            |   | OVCAR3 |   |   |   |
|------------|---|--------|---|---|---|
| AICAR      | + | -      | - | - | - |
| Compound C | - | -      | - | - | + |

Supplementary Figure 9. Full-size blots of Figure 4g.

# Supplementary Figure 10

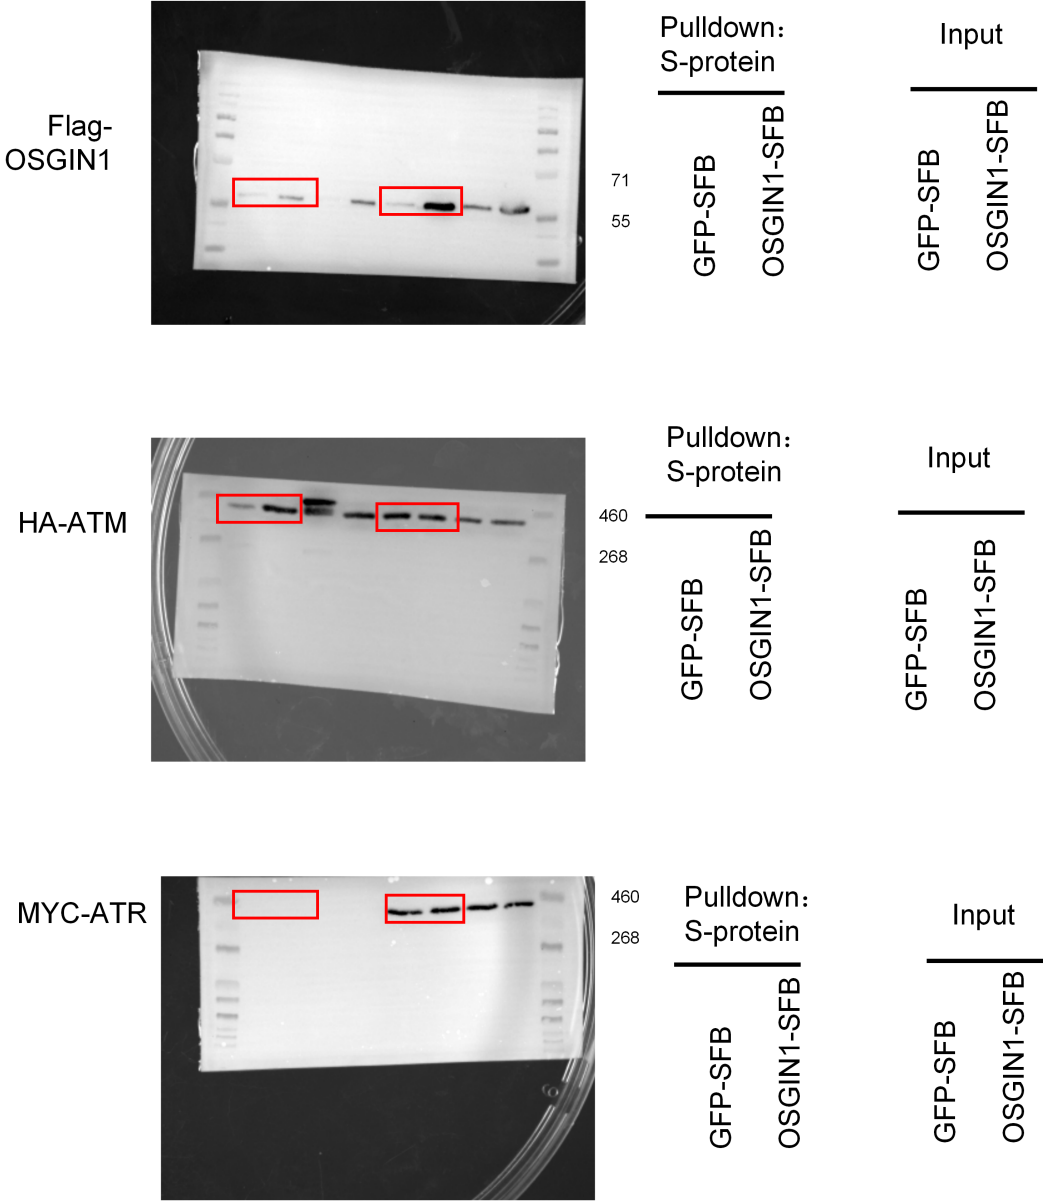

Supplementary Figure 10. Full-size blots of Figure 5a.

# Supplementary Figure 11

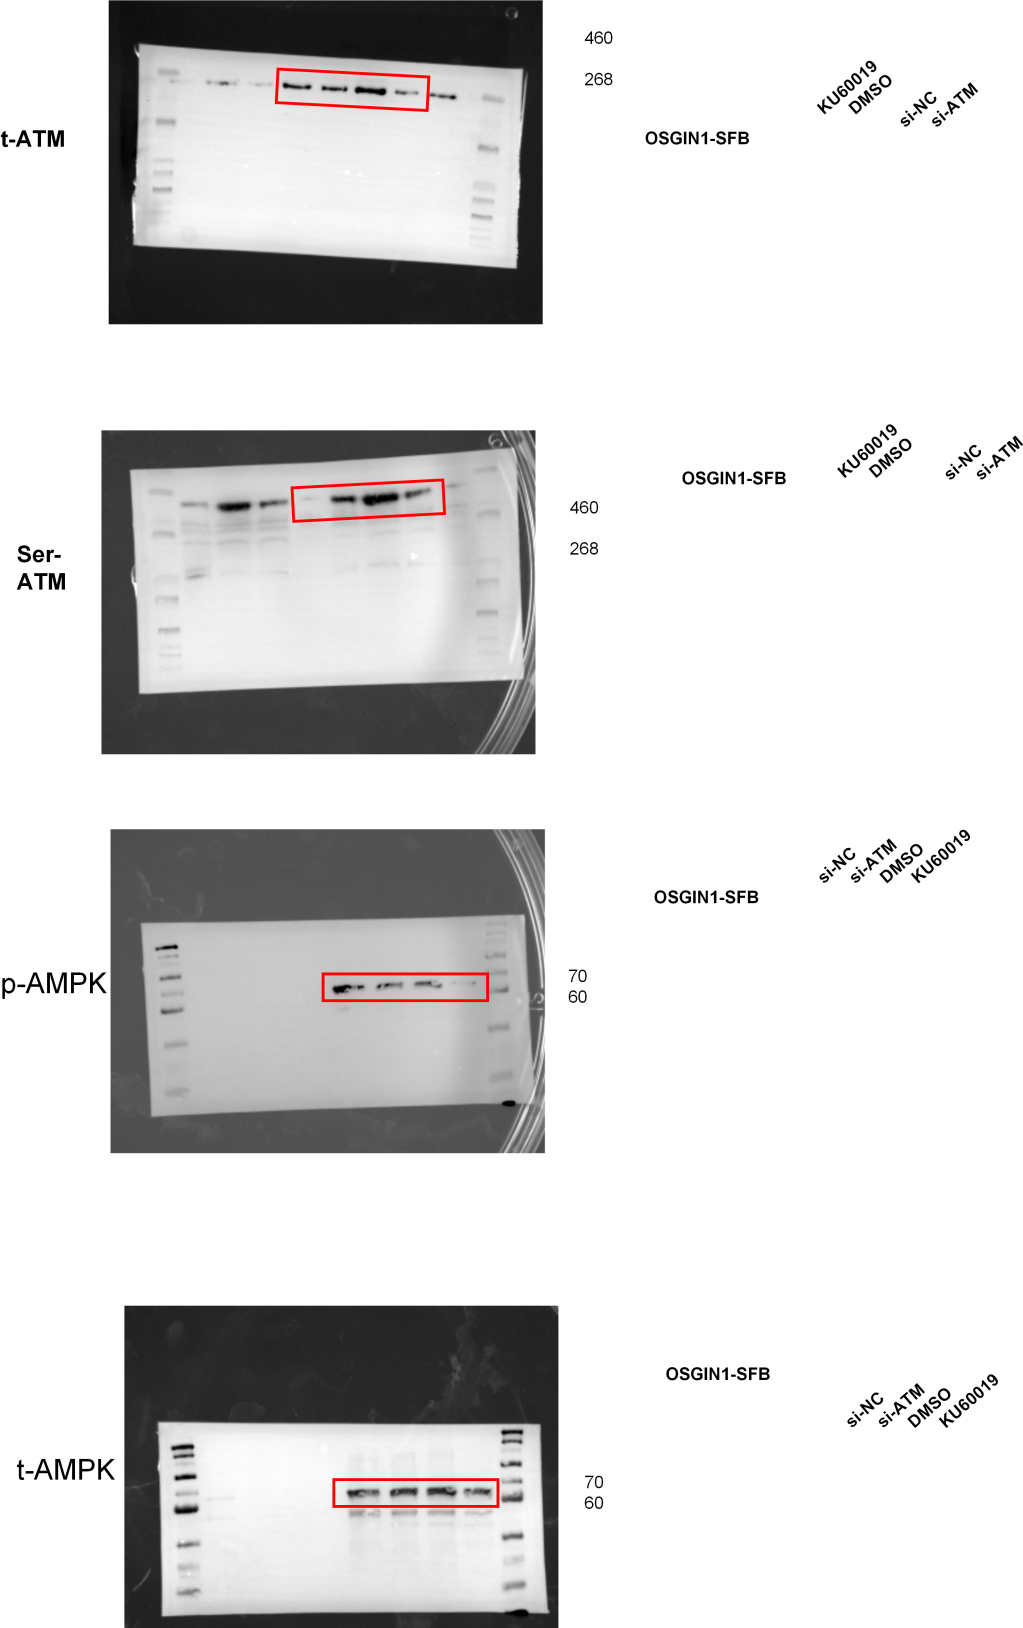

Supplementary Figure 11. Full-size blots of Figure 5b.

# Supplementary Figure 12

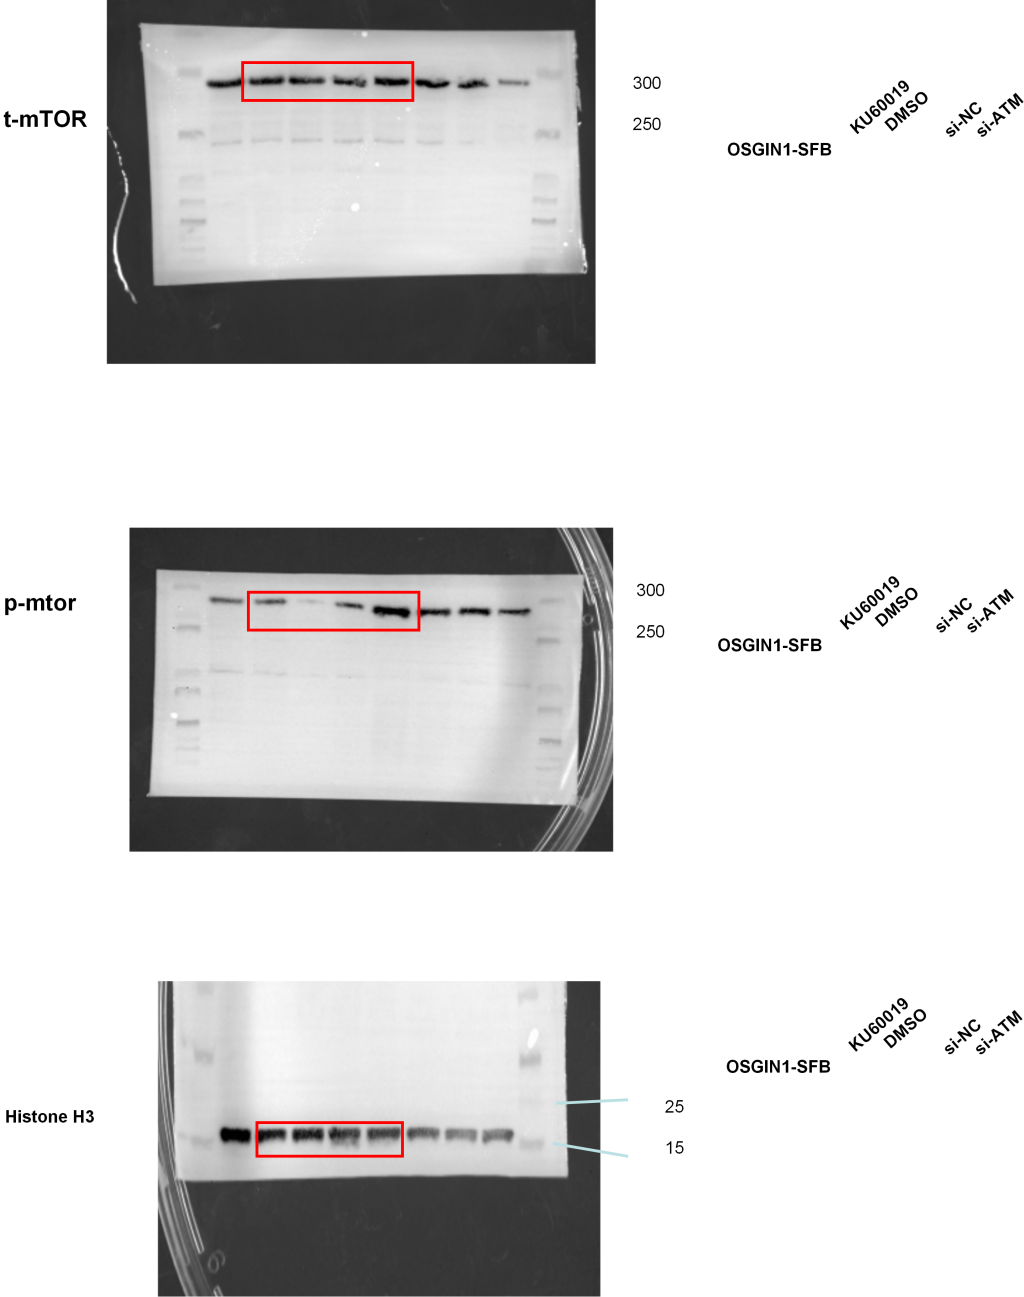

Supplementary Figure 12. Full-size blots of Figure 5b.

# Supplementary Figure 13

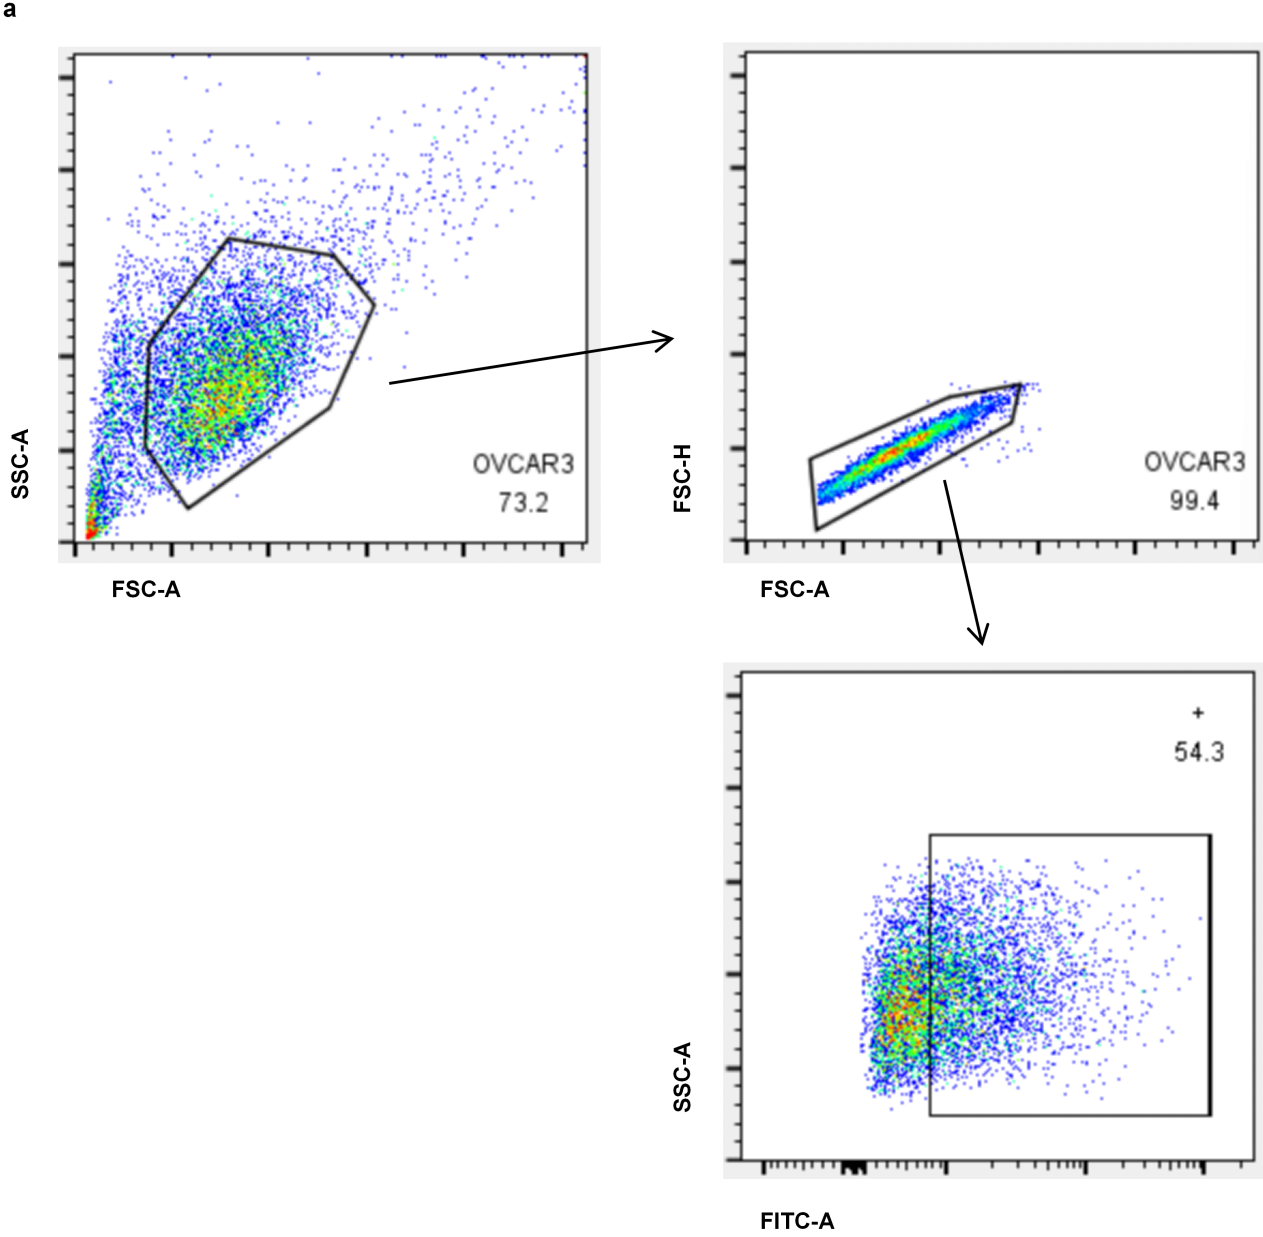

Supplementary Figure 13. Gating strategy to determine the percentage of OVCAR3 cells.

# Supplementary Figure 14

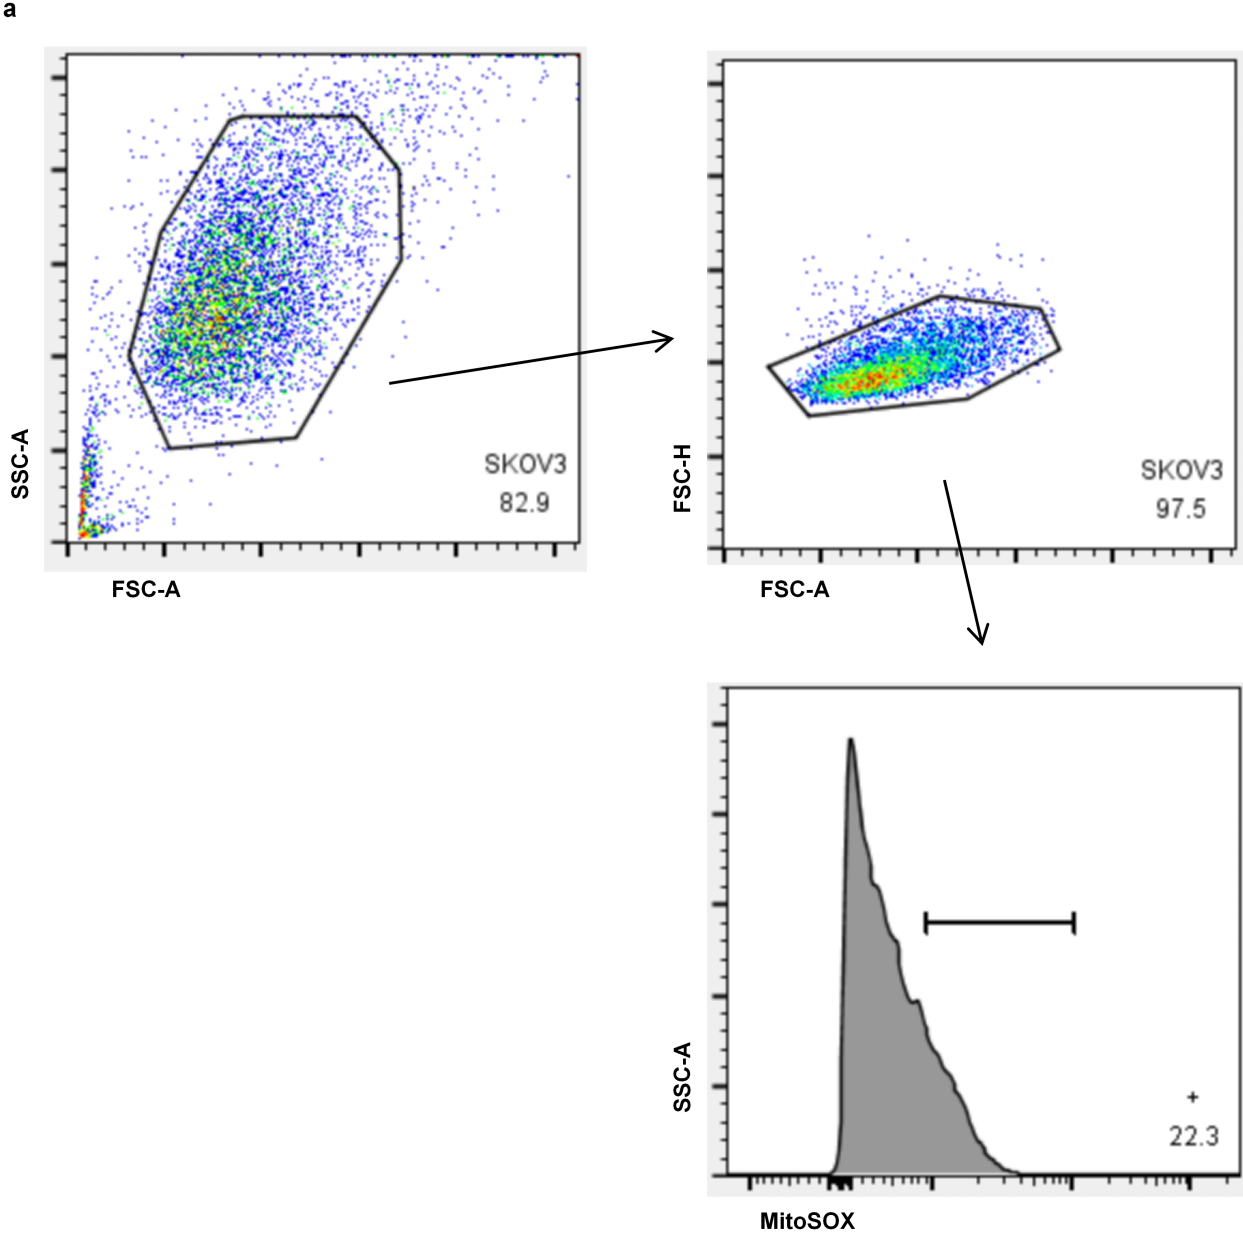

Supplementary Figure 14. Gating strategy to determine the percentage of SKOV3 cells.
